# Supplementary material for: Immersion-Driven Structural Evolution of NiFeS Nanosheets for Efficient Water Splitting
Source: MDPI journal article supplement (doi:10.3390/nano14010023), 2023-12-20
Supplement: s1 [file s1]

## Supporting Information

# Immersion-Driven Structural Evolution of NiFeS Nanosheets for Efficient Water Splitting

Jianfeng Wang <sup>1</sup>, Bingbing Zhao <sup>2</sup>, Xiao Chen <sup>2</sup>, Haixia Liu <sup>2</sup> and Jie Zhang <sup>2,\*</sup>

<sup>1</sup> Key Laboratory for Liquid-Solid Structural Evolution and Processing of Materials, Ministry of Education, School of Materials Science and Engineering, Shandong University, Jingshi Road 17923, Jinan 250061, China; wangjianfeng@sdu.edu.cn

<sup>2</sup> Shandong Provincial Key Laboratory of Molecular Engineering, School of Chemistry and Chemical Engineering, Qilu University of Technology (Shandong Academy of Sciences), Jinan 250353, China; 17863659535@163.com (B.Z.); 10431220343@stu.qlu.edu.cn (X.C.); liuhaixia929@qlu.edu.cn (H.L.)

\* Correspondence: zh\_jie@qlu.edu.cn

### This part includes:

Figure S1-S3

Table S1

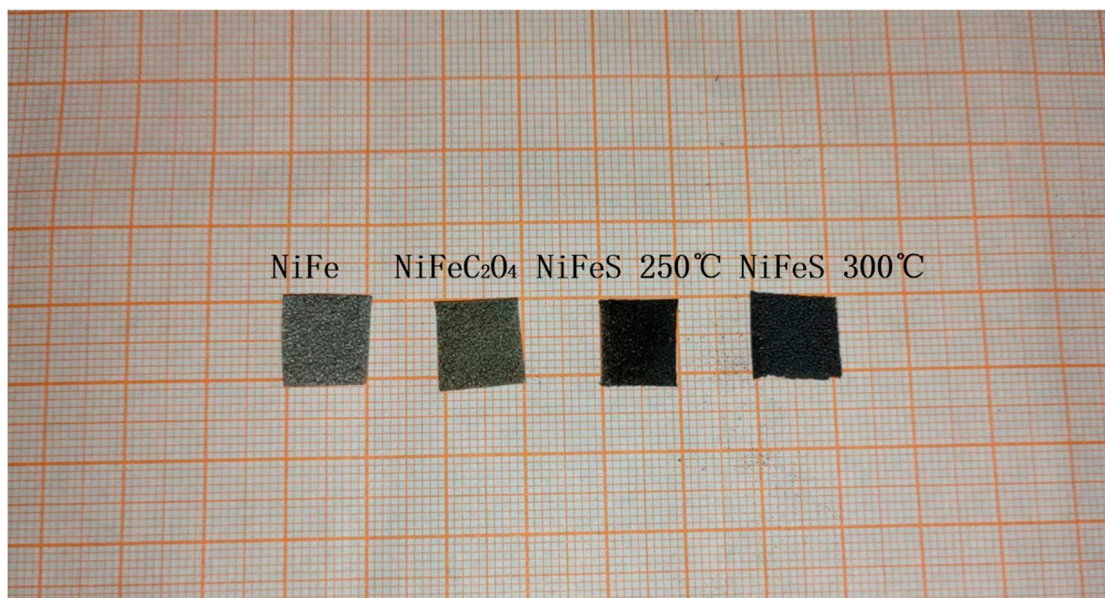

Figure S1. Optical photographs showing the fabrication processes of the NiFeS/NFF-250 and NiFeS/NFF-300 electrodes.

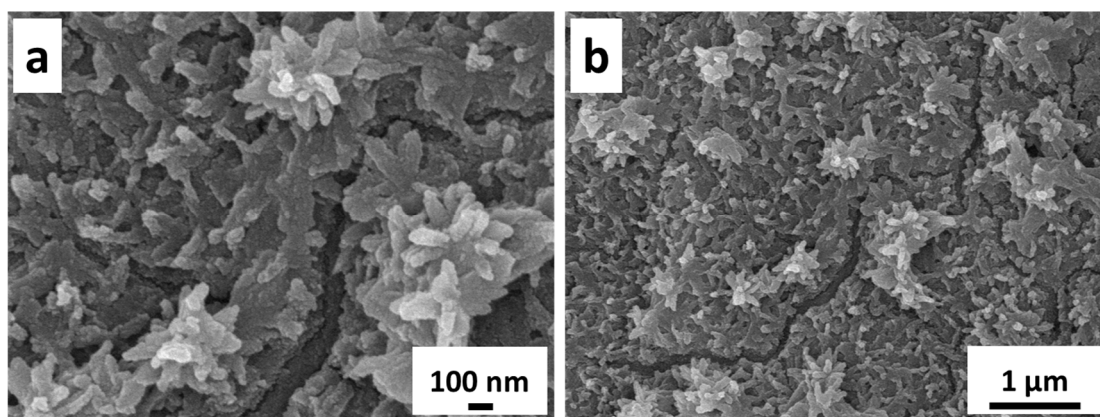

Figure S2. SEM images of NiFeS/NFF-300 after the OER durability at different magnifications.

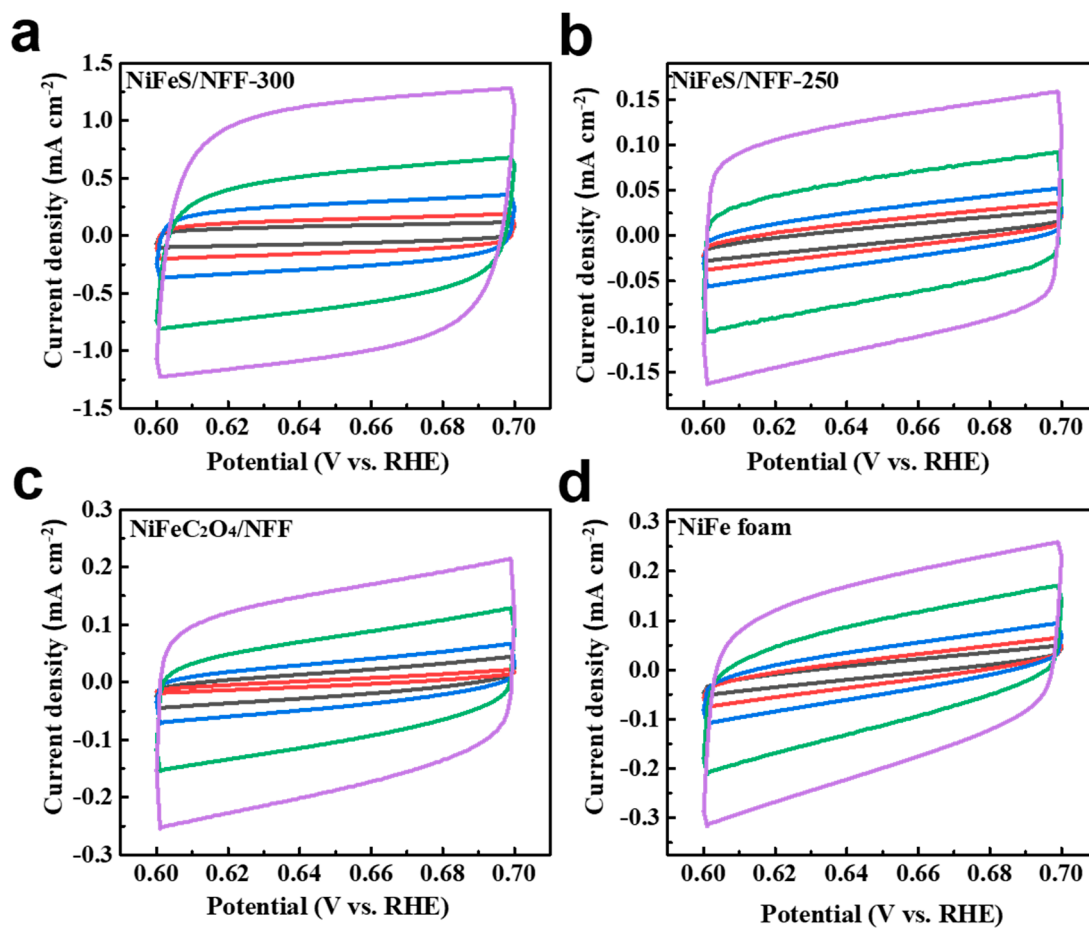

Figure S3. CVs for (a) NiFeS/NFF-300, (b) NiFeS/NFF-250, (c) NiFeC<sub>2</sub>O<sub>4</sub>/NFF, and (d) NiFe foam measured in the potential range from 0.6 to 0.7 V vs. RHE at different scan rates from 5 to 100 mV s<sup>-1</sup> in the 1 M KOH.

Table S1. Comparison of the electrocatalytic OER performance of the NiFeS with other non-precious

| catalysts                                            | $\eta_{10}$ (mV) | Reference       |
|------------------------------------------------------|------------------|-----------------|
| CoFe <sub>2</sub> O <sub>4</sub> NSs                 | 275              | 1               |
| NiFeHCH                                              | 389              | 2               |
| MoS <sub>2</sub> @CoO                                | 325              | 3               |
| $\alpha$ -Mn <sub>2</sub> O <sub>3</sub>             | 340              | 4               |
| Co <sub>6</sub> W <sub>6</sub> C@NC                  | 268              | 5               |
| CeO <sub>x</sub> CoP                                 | 264              | 6               |
| Ni <sub>0.33</sub> Co <sub>0.67</sub> S <sub>2</sub> | 320              | 7               |
| Co <sub>3</sub> O <sub>4</sub> @PPy                  | 440              | 8               |
| CoSe <sub>2</sub> CNTs                               | 300              | 9               |
| CuCo <sub>2</sub> S <sub>4</sub> CNS                 | 269              | 10              |
| VFe-MOF@NF                                           | 246              | 11              |
| FeNi <sub>3</sub> @NC                                | 277              | 12              |
| Ni-Fe-P-B                                            | 269              | 13              |
| NiS <sub>2</sub> /MoS <sub>2</sub>                   | 234              | 14              |
| Ni/NiSP <sub>x</sub>                                 | 231              | 15              |
| <b>NiFeS/NFF</b>                                     | <b>230</b>       | <b>Our work</b> |

## References

1. Fang, H.; Huang, T.; Liang, D.; Qiu, M.; Sun, Y.; Yao, S.; Yu, J.; Dinesh, M. M.; Guo, Z.; Xia, Y.; Mao, S. Prussian blue analog-derived 2D ultrathin  $\text{CoFe}_2\text{O}_4$  nanosheets as high-activity electrocatalysts for the oxygen evolution reaction in alkaline and neutral media. *J. Mater. Chem. A* **2019**, 7 (13), 7328-7332.
2. Karthick, K.; Anantharaj, S.; Ede, S. R.; Kundu, S. Nanosheets of nickel iron hydroxy carbonate hydrate with pronounced OER activity under alkaline and near-neutral conditions. *Inorg. Chem.* **2019**, 58 (3), 1895-1904.
3. Cheng, P.; Yuan, C.; Zhou, Q.; Hu, X.; Li, J.; Lin, X.; Wang, X.; Jin, M.; Shui, L.; Gao, X.; Nötzel, R.; Zhou, G.; Zhang, Z.; Liu, J. Core-shell  $\text{MoS}_2@\text{CoO}$  electrocatalyst for water splitting in neutral and alkaline solutions. *J. Phys. Chem. C* **2019**, 123 (10), 5833-5839.
4. Kölbach, M.; Fiechter, S.; van de Krol, R.; Bogdanoff, P. Evaluation of electrodeposited  $\alpha\text{-Mn}_2\text{O}_3$  as a catalyst for the oxygen evolution reaction. *Catal. Today* **2017**, 290, 2-9.
5. Chen, J.; Ren, B.; Cui, H.; Wang, C. Constructing pure phase tungsten-based bimetallic carbide nanosheet as an efficient bifunctional electrocatalyst for overall water splitting. *Small* **2020**, 16 (23), e1907556.
6. Zhang, T.; Wu, X.; Fan, Y.; Shan, C.; Wang, B.; Xu, H.; Tang, Y. Hollow  $\text{CeO}_x/\text{CoP}$  heterostructures using two-dimensional Co-MOF as template for efficient and stable electrocatalytic water splitting. *ChemNanoMat* **2020**, 6 (7), 1119-1126.
7. Peng, Z.; Jia, D.; Al-Enizi, A. M.; Elzatahry, A. A.; Zheng, G. From water oxidation to reduction: homologous Ni-Co based nanowires as complementary water splitting electrocatalysts. *Adv. Energy Mater.* **2015**, 5 (9), 1402031.
8. Tong, Y.; Liu, H.; Dai, M.; Xiao, L.; Wu, X. Metal-organic framework derived  $\text{Co}_3\text{O}_4/\text{PPy}$  bifunctional electrocatalysts for efficient overall water splitting. *Chinese Chem. Lett.* **2020**, 31 (9), 2295-2299.
9. Wei, G.; Du, K.; Zhao, X.; Wang, J.; Yan, W.; An, C.; An, C. Cable-like carbon nanotubes decorated metal-organic framework derived ultrathin  $\text{CoSe}_2/\text{CNTs}$  nanosheets for electrocatalytic overall water splitting. *Chinese Chem. Lett.* **2020**, 31 (10), 2641-2644.
10. Hao, Z.; Wei, P.; Yang, Y.; Sun, J.; Song, Y.; Guo, D.; Liu, L. Self-assembled  $\text{CuCo}_2\text{S}_4$

nanosheets with rich surface  $\text{Co}^{3+}$  as efficient electrocatalysts for oxygen evolution reaction. *Appl. Surf. Sci.* **2021**, 536, 147826.

11. Han, L.; Xu, J.; Huang, Y.; Dong, W.; Jia, X. High-performance electrocatalyst of vanadium-iron bimetal organic framework arrays on nickel foam for overall water splitting. *Chinese Chem. Lett.* **2021**, 32 (7), 2263-2268.

12. Chen, D.; Zhu, J.; Mu, X.; Cheng, R.; Li, W.; Liu, S.; Pu, Z.; Lin, C.; Mu, S. Nitrogen-doped carbon coupled  $\text{FeNi}_3$  intermetallic compound as advanced bifunctional electrocatalyst for OER, ORR and Zn-air batteries. *Appl. Catal. B: Environ.* **2020**, 268, 118729.

13. Tang, W.; Liu, X.; Li, Y.; Pu, Y.; Lu, Y.; Song, Z.; Wang, Q.; Yu, R.; Shui, J. Boosting electrocatalytic water splitting via metal-metalloid combined modulation in quaternary Ni-Fe-P-B amorphous compound. *Nano Res.* **2020**, 13 (2), 447-454.

14. Li, C.; Liu, M.; Ding, H.; He, L.; Wang, E.; Wang, B.; Fan, S.; Liu, K. A lightly Fe-doped  $(\text{NiS}_2/\text{MoS}_2)$ /carbon nanotube hybrid electrocatalyst film with laser-drilled micropores for stabilized overall water splitting and pH-universal hydrogen evolution reaction. *J. Mater. Chem. A* **2020**, 8 (34), 17527-17536.

15. Chen, X.; Li, Q.; Che, Q.; Chen, Y.; Tan, Y.; Xu, X. Self-supported Ni/NiSP<sub>x</sub> microdendrite structure for highly efficient and stable overall water splitting in simulated industrial environment. *ACS Sustain. Chem. Eng.* **2019**, 7 (13), 11778-11786.
